# Supplementary material for: Homonuclear decoupling for spectral simplification of carbon-13 enriched molecules in solution-state NMR enhanced by dissolution DNP
Source: Royal Society of Chemistry journal article supplement (doi:10.1039/c5cp07884a), 2016-01-01
Supplement: c5cp07884a1.pdf [file c5cp07884a1.pdf]

Homonuclear decoupling for spectral simplification of carbon-13 enriched molecules  
in solution-state NMR enhanced by dissolution DNP

## Electronic Supplementary Information (ESI)

### Homonuclear decoupling for spectral simplification of carbon-13 enriched molecules in solution-state NMR enhanced by dissolution DNP

Srinivas Chinthalapalli,<sup>1,2</sup> Aurélien Bernet,<sup>1</sup> Diego Carnevale,<sup>1,3,\*</sup> Sami Jannin<sup>1</sup> and Geoffrey  
Bodenhausen<sup>1,3,4,5</sup>

<sup>1</sup> *Institut des sciences et ingénierie chimiques (ISIC), Ecole Polytechnique Fédérale de Lausanne (EPFL), CH-1015 Lausanne, Switzerland.*

<sup>2</sup> *Department of Chemistry, School of Chemical Sciences, Central University of Karnataka, Gulbarga, 585311 Karnataka, India.*

<sup>3</sup> *Neuchâtel Platform of Analytical Chemistry (NPAC), Institut de Chimie, Université de Neuchâtel, Avenue de Bellevaux 51, 2000 Neuchâtel, Switzerland.*

<sup>4</sup> *École Normale Supérieure-PSL Research University, Département de Chimie, 24 rue Lhomond, F-75005 Paris, France.*

<sup>5</sup> *Sorbonne Universités, UPMC Univ Paris 06, LBM, 4 place Jussieu, F-75005, Paris, France.*

<sup>6</sup> *CNRS, UMR 7203 LBM, F-75005, Paris, France.*

Corresponding author: Diego Carnevale  
[diego.carnevale@unine.ch](mailto:diego.carnevale@unine.ch)

Homonuclear decoupling for spectral simplification of carbon-13 enriched molecules  
in solution-state NMR enhanced by dissolution DNP

**Pulse program**

Pulse program for a Bruker AVANCE-I system used to obtain the experimental spectra of Figs. 2 and 3. The phase list may be generated externally in a spreadsheet and depends on the desired frequencies to be irradiated. In this example,  $m = 6$  distinct irradiation frequencies were generated.

```
#include <Avance.incl>
#include <Avancesolids.incl>

"d9=0.1u"
"d25=1.3u"
"d22=5.0u"
define delay dead
"dead=1.2u"
define delay acq
"acq=10.0u"
"d24=d23-dead-acq+0.2u+d25"
"d30=1u+d23+d22+p2+d22+p2++d22+p2+d22+p2+d22+p2+d22+p2+d24+dead+acq+0.2u+d25" ;add extra p2 since
      using 2 p2's

define loopcounter count ;make sure td datapoints are sampled
"count=(td/2+1)*decim"
;AV I and AV II hardware: blktr# is transmitter blanking for f# logical channel
;blktr1 for f1 logical channel; blktr2 for f2 logical channel
"blktr2 = 0.7u"

"d11=30m"
"d12=20u"
1 ze
d11 p117:f4 LOCKDEC_ON
50u LOCKH_ON
d11 H2_PULSE

2 d30 do:f4
10u reset:f1 reset:f2 ;synchronise pulse and detection RF
1u p11:f2 ;preselect power level for inital pulses
```

Homonuclear decoupling for spectral simplification of carbon-13 enriched molecules  
in solution-state NMR enhanced by dissolution DNP

STARTADC ;prepare adc for sampling, set reference frequency  
RESETPHASE ;reset reference phase  
RGP\_ADC\_ON ;open ADC gate  
1u REC\_BLK ;blank the receiving path

30m H2\_LOCK  
6m LOCKH\_OFF  
d1  
50u LOCKH\_ON  
d12 H2\_PULSE  
p1:f2 ph1

0.1u cpd4:f4

3 1u p12:f2  
d22  
(p2 ph2^):f2  
d22 p13:f2  
(p2 ph3^):f2  
d22 p15:f2  
(p2 ph4^):f2  
d22 p16:f2  
(p2 ph5^):f2  
d22 p17:f2  
(p2 ph6^):f2  
d22 p18:f2  
(p2 ph7^):f2  
d24

dead

acq setrtp1|0|1|2 ;open receiver path

d23

0.1u setrtp1|7

0.1u setrtp1^0^1^2^7 ;this is sample macro

d25 ;to keep timing if pulsing on f1

lo to 3 times count ;make sure td points are sampled

1m

rcyc=2 ;next scan

Homonuclear decoupling for spectral simplification of carbon-13 enriched molecules  
in solution-state NMR enhanced by dissolution DNP

30m wr #0 do:f4 ;save data

d11 H2\_LOCK

d11 LOCKH\_OFF

d11 LOCKDEC\_OFF

exit

ph1=1 3

ph2 = (7) 0 1 2 3 4 5 6

ph3 = (92) 91 90 89 88 87 86 85 84 83 82 81 80 79 78 77 76 75 74 73 72 71 70 69 68 67 66 65 64 63 62 61 60 59 58  
57 56 55 54 53 52 51 50 49 48 47 46 45 44 43 42 41 40 39 38 37 36 35 34 33 32 31 30 29 28 27 26  
25 24 23 22 21 20 19 18 17 16 15 14 13 12 11 10 9 8 7 6 5 4 3 2 1 0

ph4 = (170) 0 1 2 3 4 5 6 7 8 9 10 11 12 13 14 15 16 17 18 19 20 21 22 23 24 25 26 27 28 29 30 31 32 33 34 35 36  
37 38 39 40 41 42 43 44 45 46 47 48 49 50 51 52 53 54 55 56 57 58 59 60 61 62 63 64 65 66 67 68  
69 70 71 72 73 74 75 76 77 78 79 80 81 82 83 84 85 86 87 88 89 90 91 92 93 94 95 96 97 98 99  
100 101 102 103 104 105 106 107 108 109 110 111 112 113 114 115 116 117 118 119 120 121  
122 123 124 125 126 127 128 129 130 131 132 133 134 135 136 137 138 139 140 141 142 143  
144 145 146 147 148 149 150 151 152 153 154 155 156 157 158 159 160 161 162 163 164 165  
166 167 168 169

ph5 = (52) 0 1 2 3 4 5 6 7 8 9 10 11 12 13 14 15 16 17 18 19 20 21 22 23 24 25 26 27 28 29 30 31 32 33 34 35 36 37  
38 39 40 41 42 43 44 45 46 47 48 49 50 51

ph6 = (30) 0 1 2 3 4 5 6 7 8 9 10 11 12 13 14 15 16 17 18 19 20 21 22 23 24 25 26 27 28 29

ph7 = (19) 0 1 2 3 4 5 6 7 8 9 10 11 12 13 14 15 16 17 18

ph30 = 0

ph31 = 0 2

Homonuclear decoupling for spectral simplification of carbon-13 enriched molecules  
in solution-state NMR enhanced by dissolution DNP

**Numerical simulations**

Numerical simulations for SIMPSON for a three-spin  $^{13}\text{C}$  system where two spins are irradiated in a dichromatic ( $m = 2$ ) experiment. The phase increments for the two pulses within each dwell time are given by  $\Delta\phi_m = \Delta\nu_m \Delta t 360^\circ/10^6$  where  $\Delta\nu_m$  [Hz] is the offset with respect to the carrier frequency that one wishes to irradiate, and  $\Delta t$  [ $\mu\text{s}$ ] is the dwell time. By setting the *rf* amplitude  $\text{rfw} = 0$ , one obtains the unperturbed, J-coupled spectrum.

```
spinsys {
  channels 13C
  nuclei 13C 13C 13C
  shift 1 -1500 0 0 0 0 0
  shift 2 500 0 0 0 0 0
  shift 3 1500 0 0 0 0 0
  jcoupling 1 2 -50 0 0 0 0 0
  jcoupling 1 3 -10 0 0 0 0 0
  jcoupling 2 3 -40 0 0 0 0 0
}

par {
  start_operator Inz
  detect_operator Inp
  spin_rate 0
  gamma_angles 1
  sw 10000
  crystal_file alpha0beta0
  np 4096*4
  proton_frequency 400e6
  verbose 01001

  variable rf 33333.3333333
  variable rfw 4000
  variable tp 0.25e6/rf
  variable tpw 0.25e6/rfw
}
```

Homonuclear decoupling for spectral simplification of carbon-13 enriched molecules  
in solution-state NMR enhanced by dissolution DNP

```
variable np1 2048
variable tdwell 1.0e6/sw
}
```

```
proc pulseseq {} {
  global par

  reset
  offset 0
  pulse $par(tp) $par(rf) y
  acq
  for {set i 1} {$i < $par(np)} {incr i} {
    delay [expr ($par(tdwell)/2)-1]
    pulse 1 $par(rfw) [expr 0-$i*18]
    delay [expr ($par(tdwell)/2)-1]
    pulse 1 $par(rfw) [expr 0+$i*54]
    acq
  }
}
```

```
proc main {} {
  global par
  set f [fsimpson]
  fsave $f $par(name).fid
  fzerofill $f 32768
  faddlb $f 1 0
  fft $f
  fsave $f $par(name).spe
}
```

Homonuclear decoupling for spectral simplification of carbon-13 enriched molecules  
in solution-state NMR enhanced by dissolution DNP

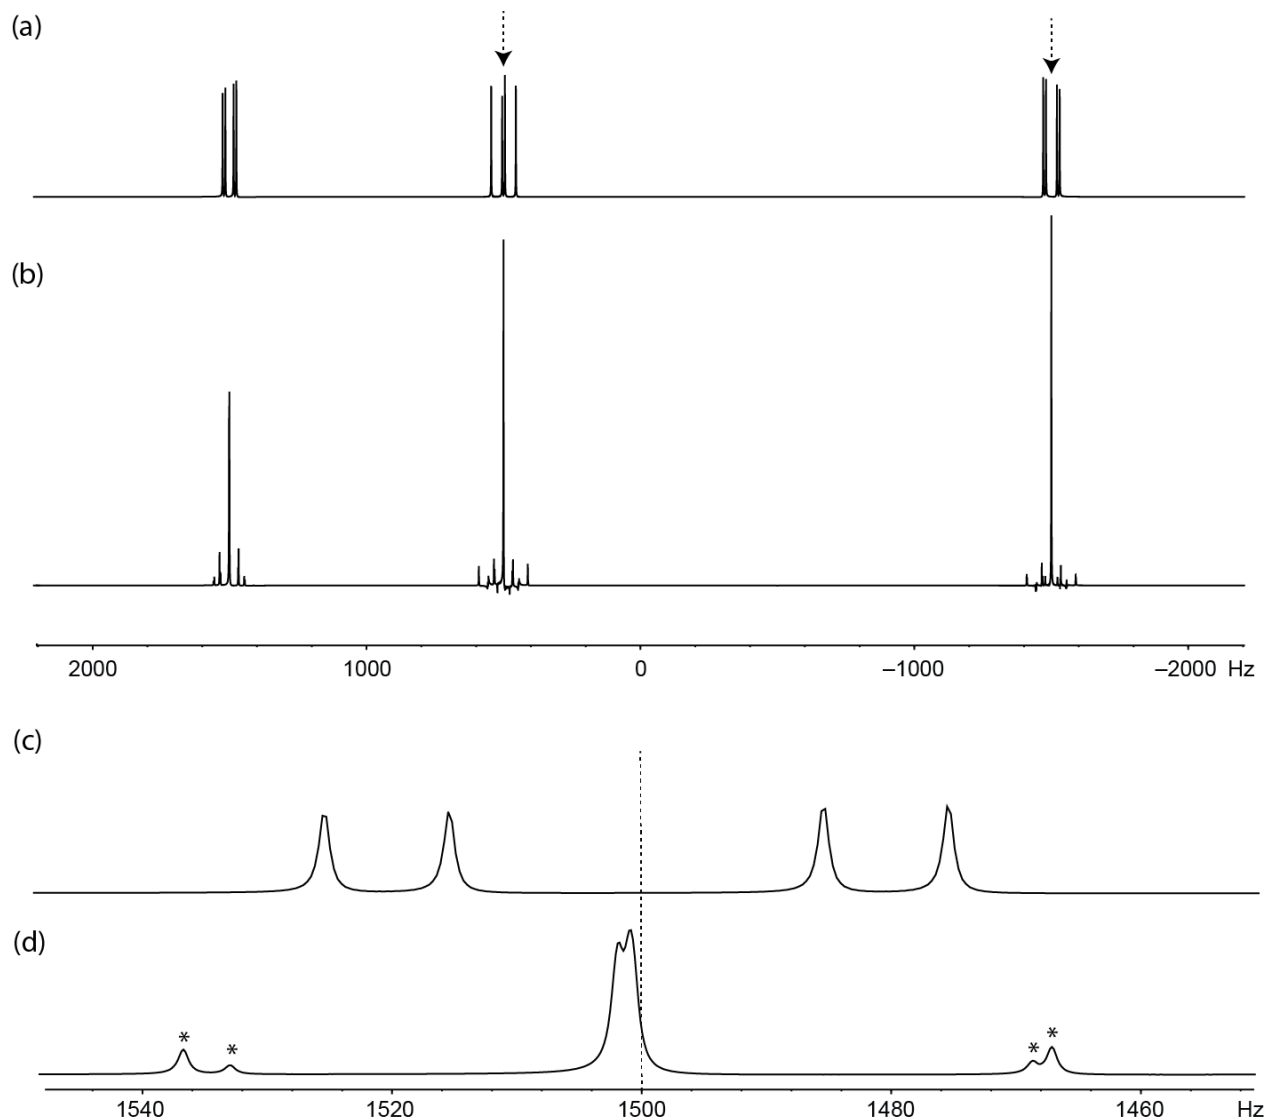

Figure S1 (a) Spectrum resulting from the numerical simulation for the input file given above with a vanishing *rf* amplitude  $r_{fw} = 0$ . (b) Spectrum with  $r_{fw} = 4000$  Hz. Dashed arrows indicate the two irradiation frequencies. (c) Expansion of the multiplet of the non-irradiated spin of (a) centered at 1500 Hz. (d) Expansion of the multiplet of the non-irradiated spin of (b) centered at 1500 Hz. Artifacts caused by the *rf*-irradiation are indicated by asterisks. The isotropic shift of the non-irradiated spin is shown by a dashed vertical line in (c) and (d).
